# Supplementary material for: Blood-Based Transcriptomic and Proteomic Biomarkers of Emphysema
Source: bioRxiv or medRxiv preprint supplement (doi:10.1101/2022.10.25.22281458), 2023-01-11
Supplement: Supplementary file [file media-3.pdf]

# Figure E1

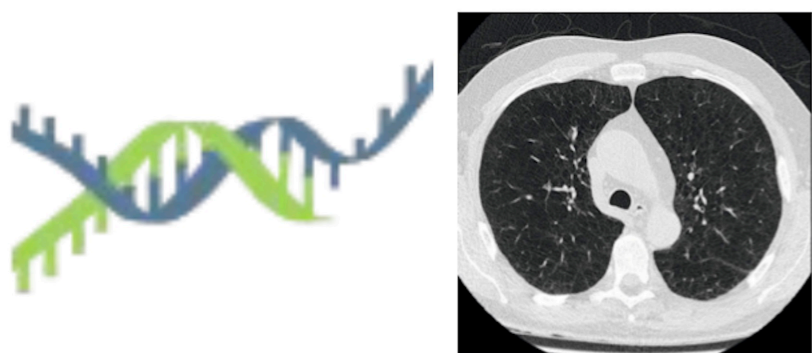

**Clinical, transcriptomic, and proteomic data collection in COPDGene visit 2**

- CT-quantified emphysema
- Whole blood RNA sequencing
- Plasma SomaScan proteomic assay

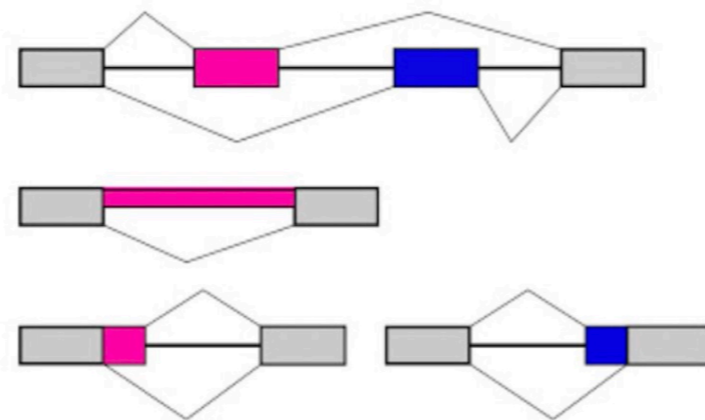

**Differential gene expression, isoform/exon usage, and gene ontology enrichment analyses (Training)**

- *Primary analysis*: Emphysema model without BMI adjustment
- *Sensitivity analysis*: Emphysema model with BMI adjustment (DGE only)

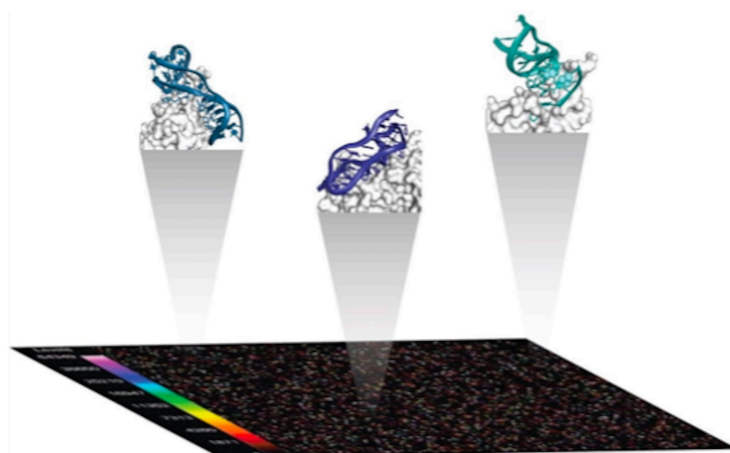

**Protein association analyses (Training)**

- *Primary analysis*: Emphysema model without BMI adjustment
- *Sensitivity analysis*: Emphysema model with BMI adjustment

**Validation analyses (Testing)**

- Differential gene expression, isoform/exon usage, and protein association analysis
- Emphysema model without BMI adjustment

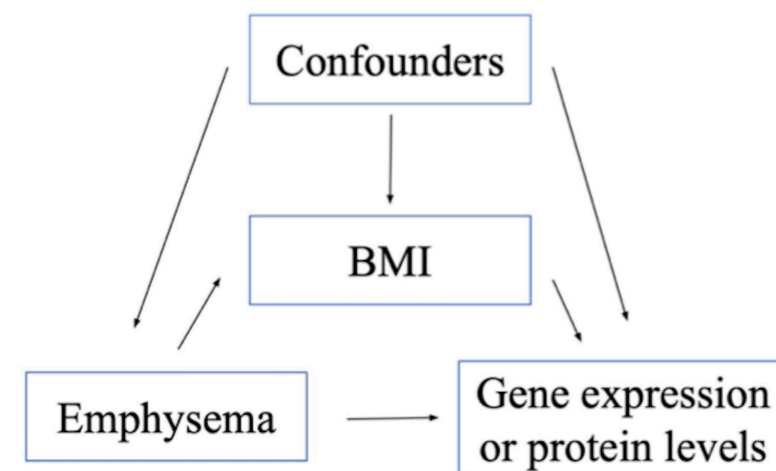

**Mediation analysis**

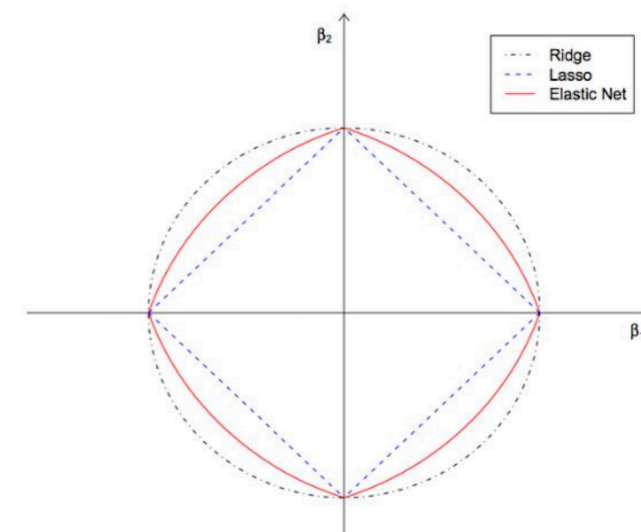

**Elastic net prediction of emphysema**  
Clinical, CBC, gene, isoform, exon, and protein predictors

Figure E2

# Top-15 adjusted Perc15-associated plasma proteins in COPDGene

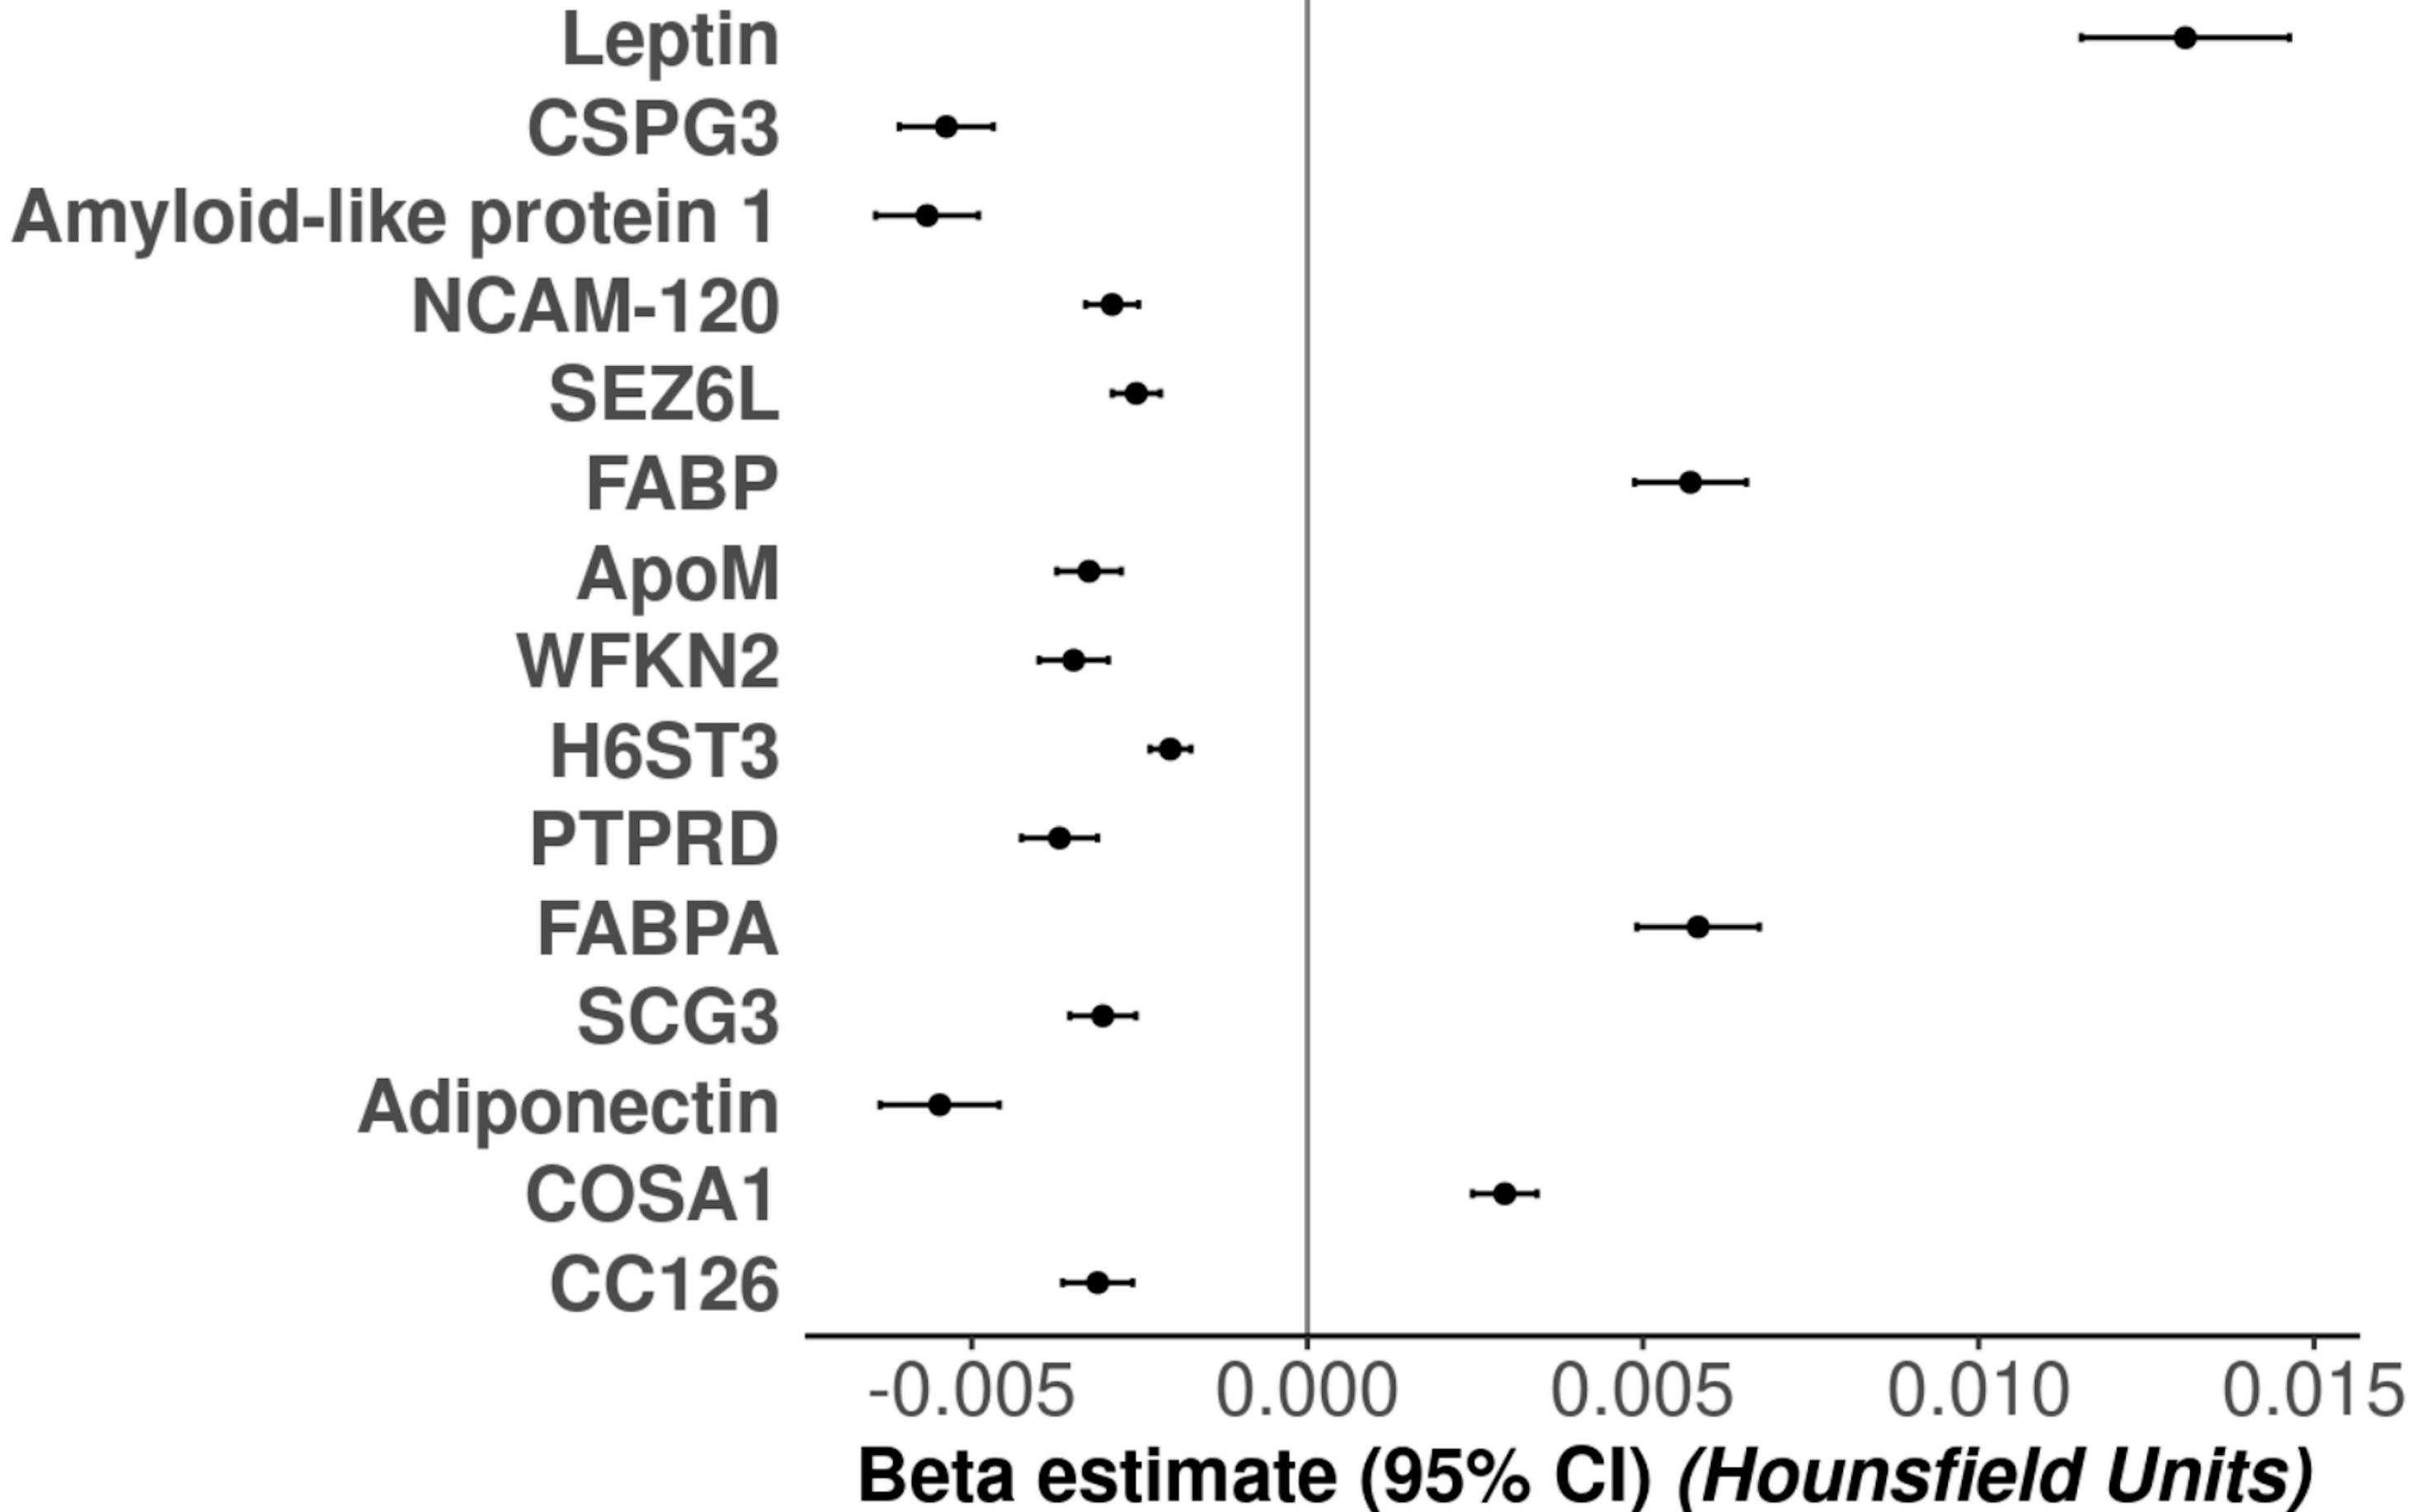

Figure E3

**DGE****(A)**

No BMI adjustment

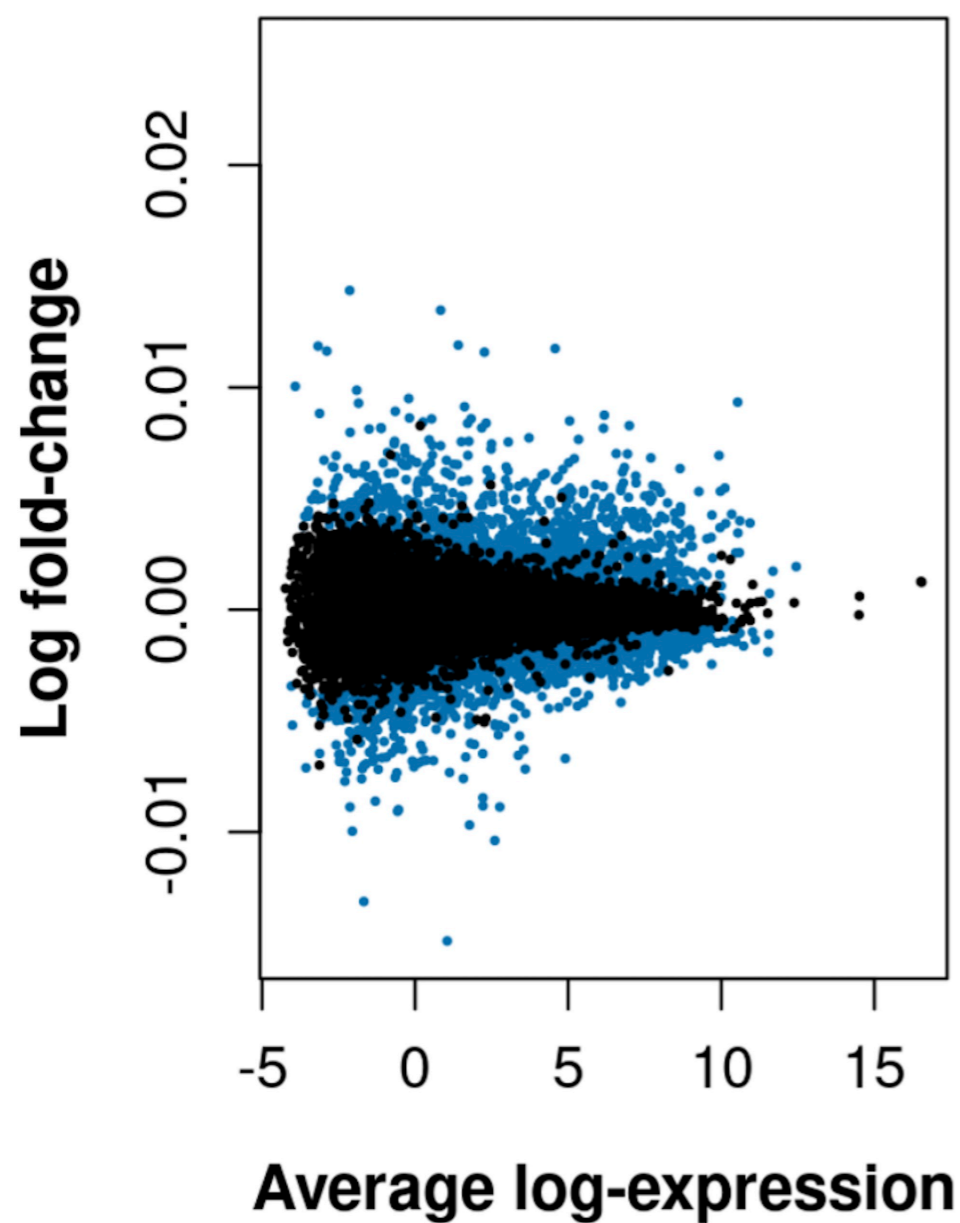**(B)**

BMI adjustment

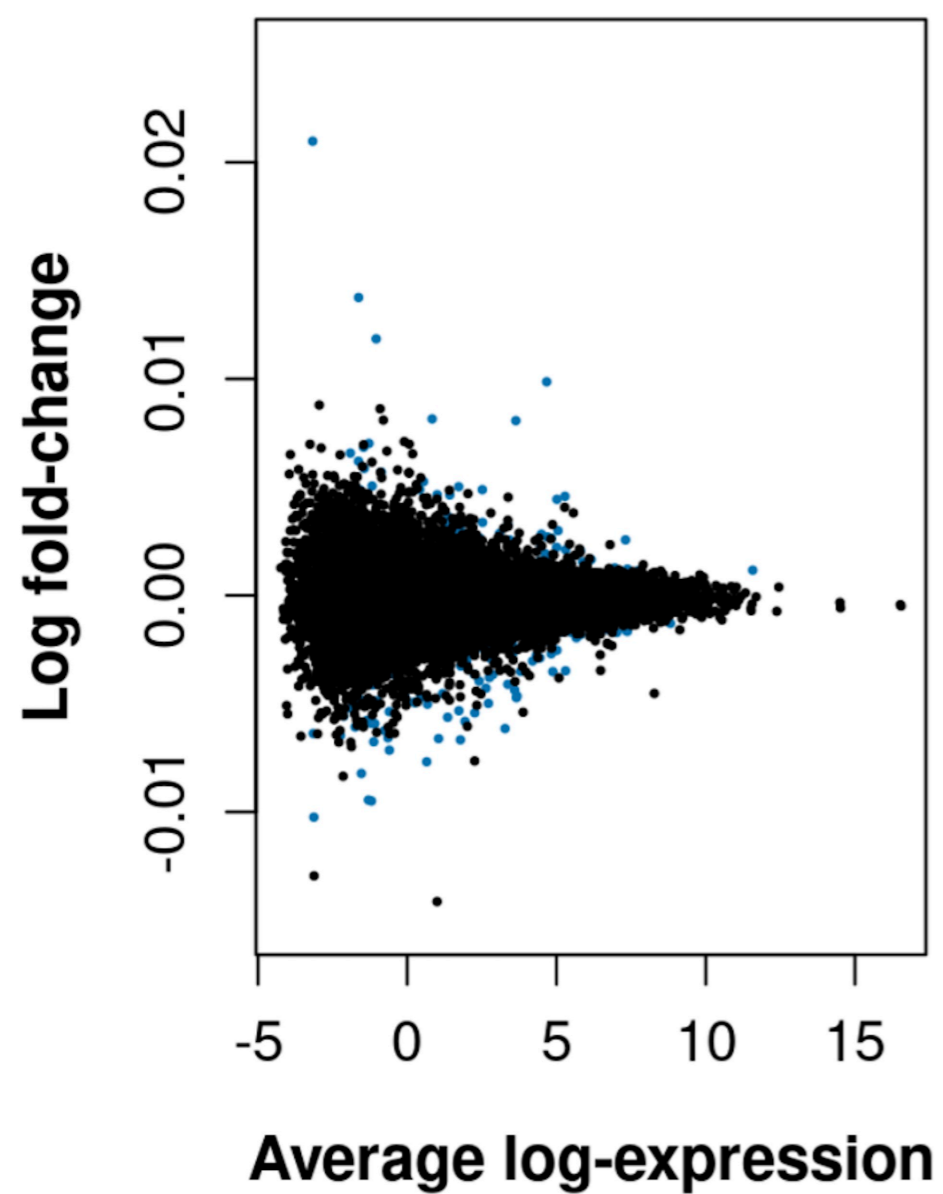**PROTEIN****(C)**

No BMI adjustment

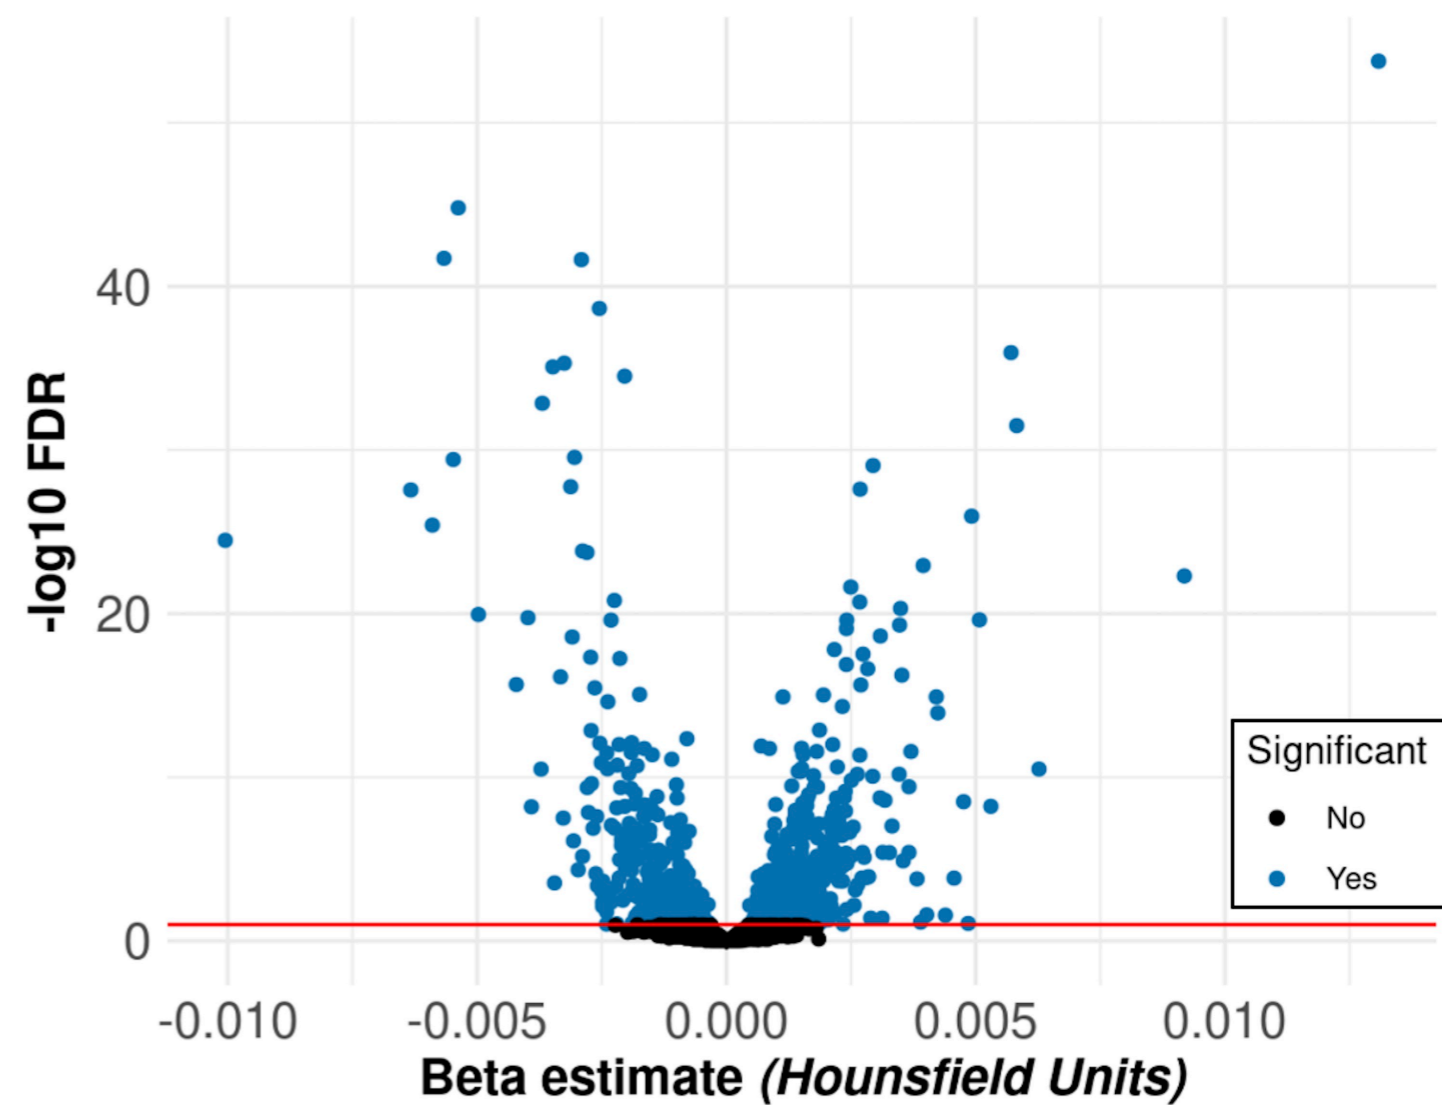**(D)**

BMI adjustment

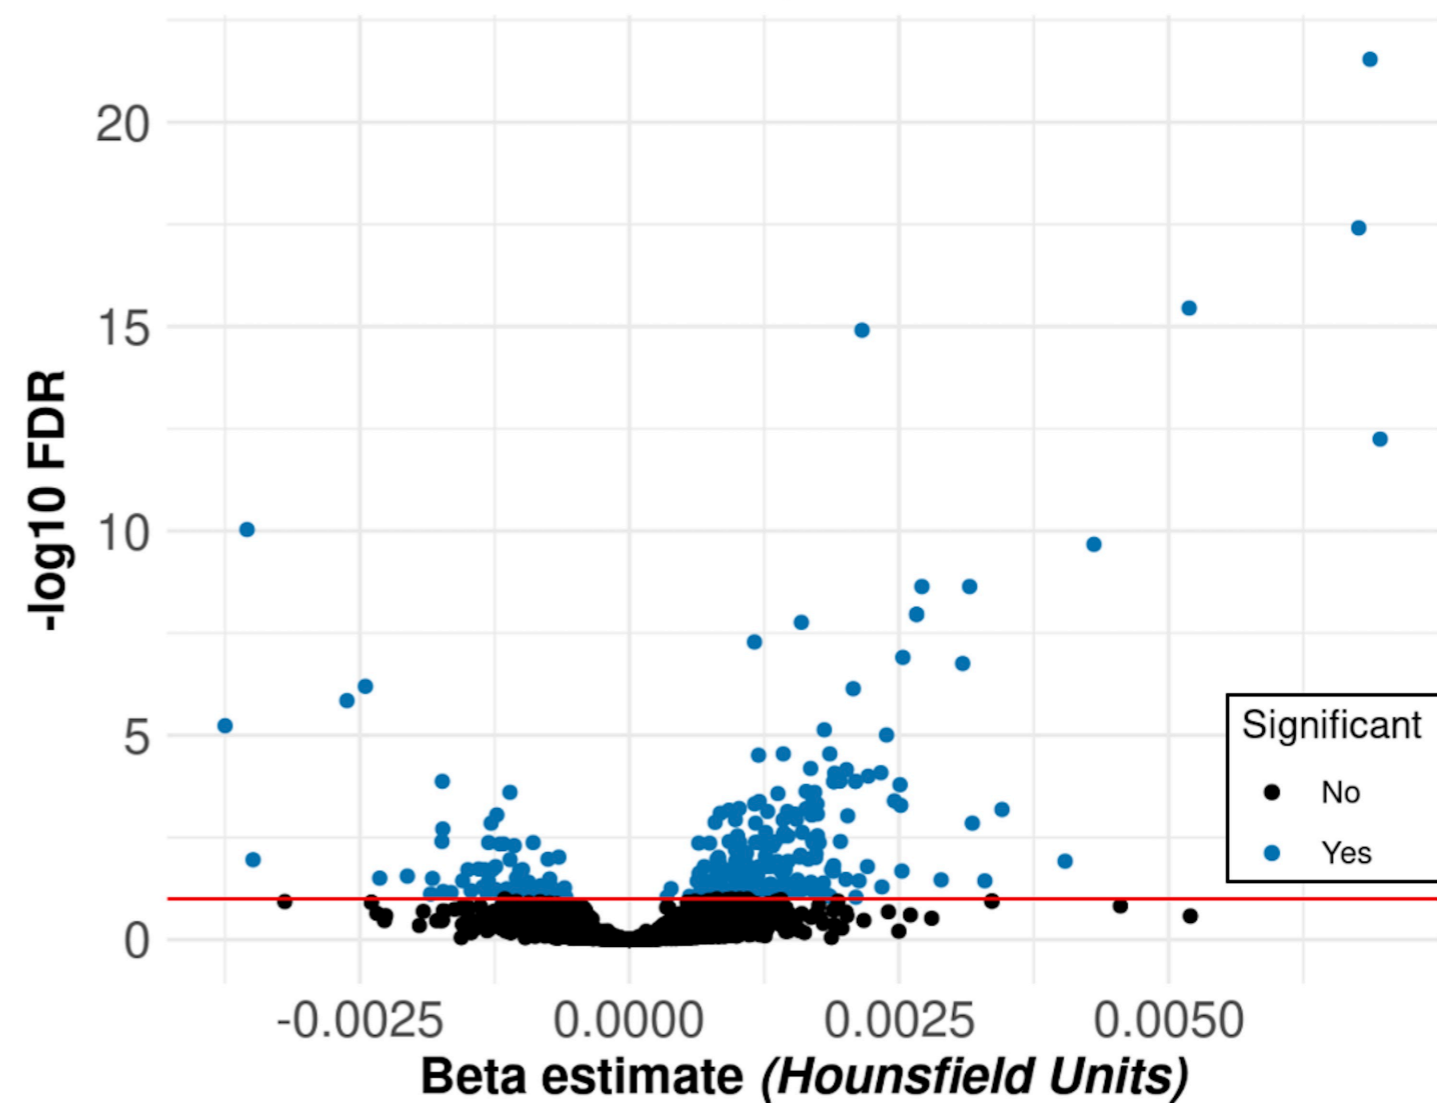

Figure E4

**Confounders**

**BMI**

**Emphysema**

**Gene expression  
or protein levels**

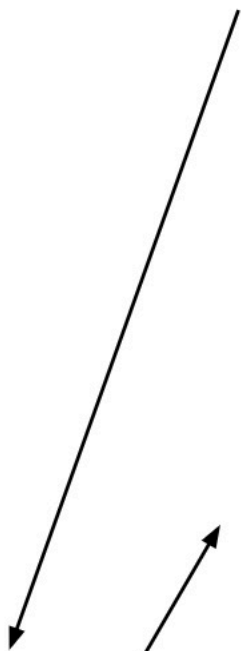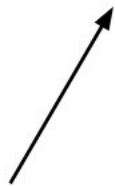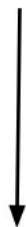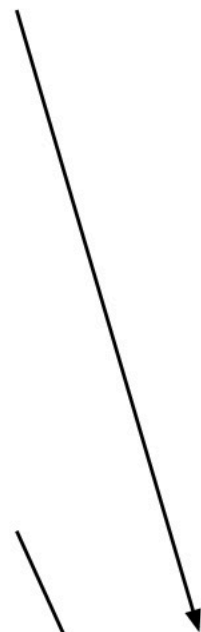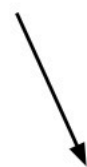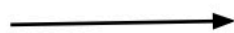



Figure E5

# Model AUROC comparison

Upper versus lower tertiles of adjusted perc15 density

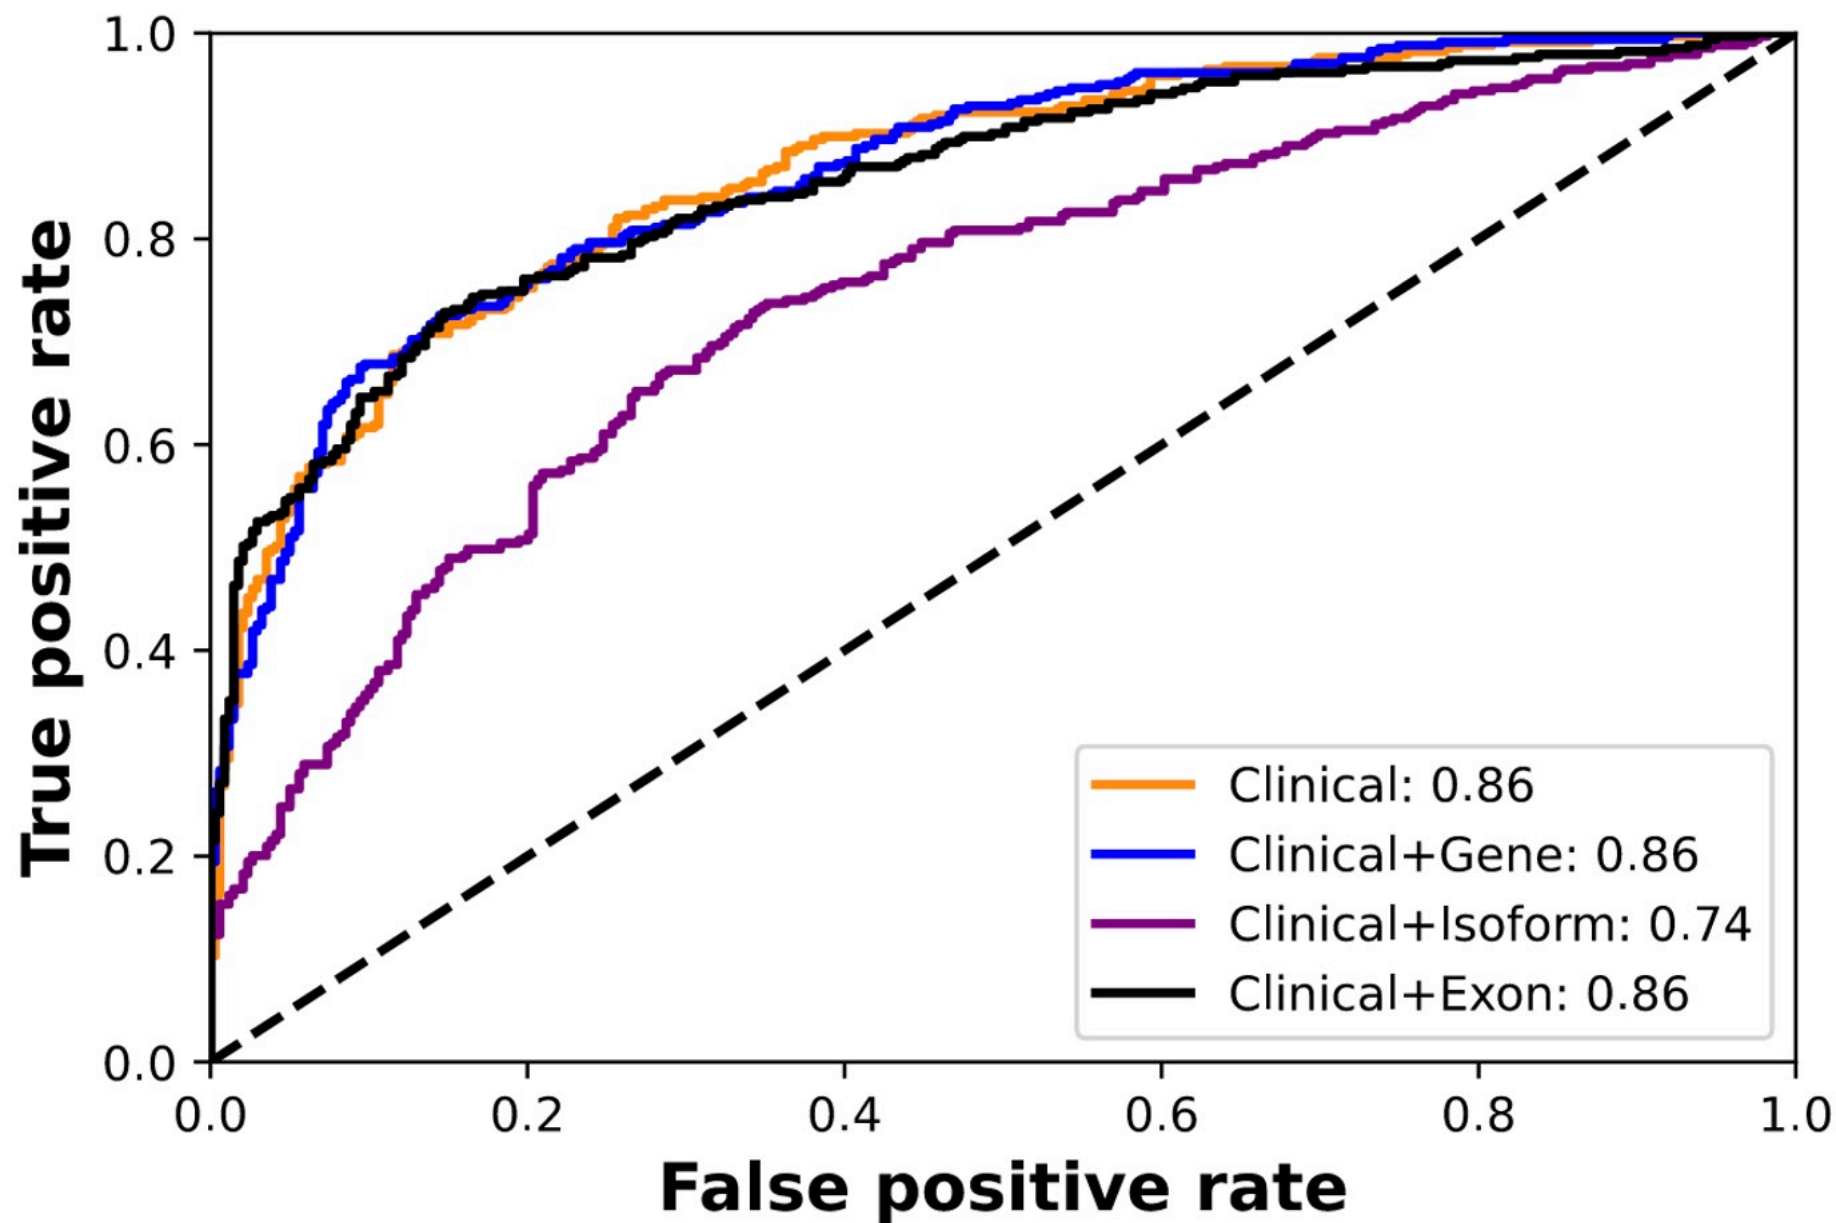

|                  | Clinical | Clinical+Gene | Clinical+Isoform |
|------------------|----------|---------------|------------------|
| Clinical+Gene    | 0.97     |               |                  |
| Clinical+Isoform | < 0.001  | < 0.001       |                  |
| Clinical+Exon    | 0.26     | 0.27          | < 0.001          |
